# Supplementary material
Source: PubMed Central journal article supplement (PMC7343053)
Supplement: kopp_supplemental_figure4_v2_ddz176.pdf [file kopp_supplemental_figure4_v2_ddz176.pdf]

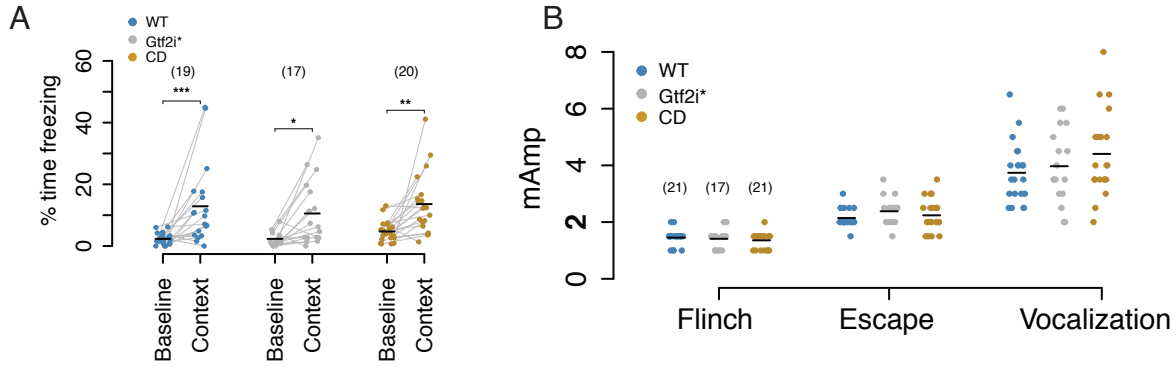

**Supplemental Figure 4. Contextual fear and shock sensitivity in WS mutant models.** **A** All genotypes show a contextual fear response. **B** The response to foot shock is similar across all genotypes. \*  $p < 0.05$ , \*\*  $p < 0.01$ , \*\*\*  $p < 0.001$  Sample sizes are shown as numbers in parentheses
